# Supplementary material for: Facile Synthesis and Environmental Applications of Noble Metal-Based Catalytic Membrane Reactors
Source: MDPI journal article supplement (doi:10.3390/catal12080861), 2022-08-05
Supplement: s1 [file s1]

## **Supplementary Materials**

# **Facile Synthesis and Environmental Applications of Noble Metal-Based Catalytic Membrane Reactors**

Haochen Yan<sup>†</sup>, Fuqiang Liu<sup>†</sup>, Jinna Zhang<sup>‡,\*</sup>, Yanbiao Liu<sup>†,§,\*</sup>

<sup>†</sup> College of Environmental Science and Engineering, Textile Pollution Controlling Engineering Center of the Ministry of Ecology and Environment, Donghua University, Shanghai 201620, China. E-mail: yanbiaoliu@dhu.edu.cn; Tel: +86-21-67798752.

<sup>‡</sup> State Key Laboratory of Urban Water Resource and Environment, School of Environment, Harbin Institute of Technology, Harbin 150090, China.  
jnzhang@hit.edu.cn

<sup>§</sup> Shanghai Institute of Pollution Control and Ecological Security, Shanghai 200092, China.

Supplementary Materials: 10 figures and 2 tables.

**Table S1.** Comparison of the 4-NP reduction performance of proposed system with reported catalytic membrane reactor systems.

| Catalysts                     | Concentration<br>of 4-NP (mM) | Flow rate<br>(mL/min) | TOF<br>(h <sup>-1</sup> ) | References       |
|-------------------------------|-------------------------------|-----------------------|---------------------------|------------------|
| Au NP/paper                   | 0.05                          | 0.05                  | 440                       | [56]             |
| Au/CNCS                       | 15                            | -                     | 191                       | [57]             |
| Au-Pd/CeO <sub>2</sub>        | 1                             | 10                    | 240                       | [58]             |
| HNT@Au                        | 0.1                           | 4                     | 416                       | [59]             |
| MCF/Au                        | 0.5                           | 6                     | 15.3                      | [60]             |
| Au NPs/sugarcane              | 20                            | 600                   | 16.2                      | [43]             |
| <b>CNT-MoS<sub>2</sub>@Au</b> | <b>0.1</b>                    | <b>2</b>              | <b>609</b>                | <b>This work</b> |

**Note:** The turn over frequency (TOF) indicated the products that can be generated in a catalytic reaction by per molar amount of catalyst.

**Table S2.** The  $k$  values related to bromate reduction under different applied potential according to pseudo-first order kinetic model.

| Applied potential (V) | $k_1$ (min <sup>-1</sup> ) | R <sup>2</sup> |
|-----------------------|----------------------------|----------------|
| -0.5                  | 0.0537                     | 0.925          |
| -1.0                  | 0.0406                     | 0.969          |
| -1.5                  | 0.0450                     | 0.964          |
| -2.0                  | 0.0382                     | 0.995          |

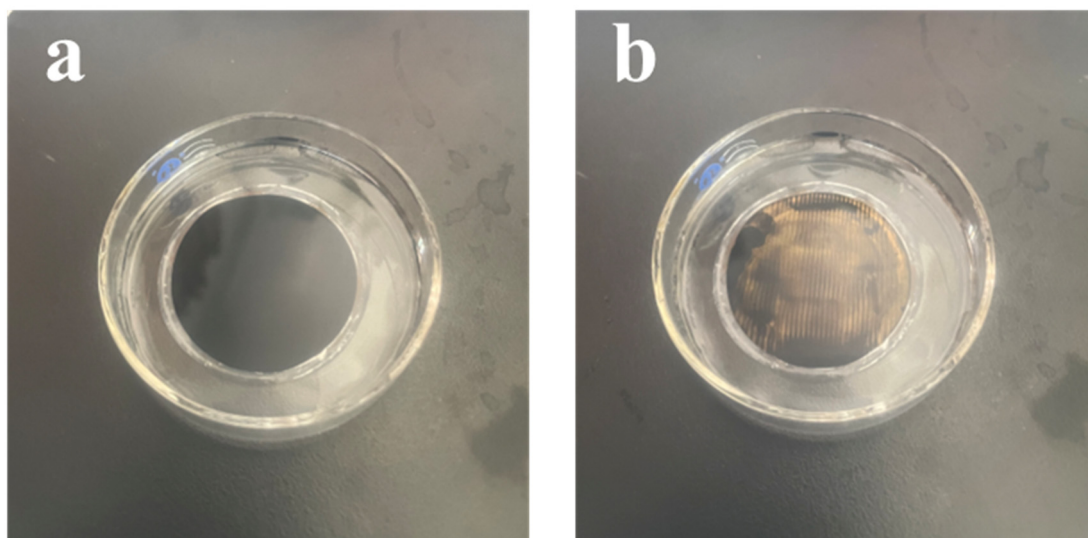

**Figure S1.** Electronic photos of (a) the CNT-MoS<sub>2</sub> membrane and (b) the CNT-MoS<sub>2</sub>@Au membrane.

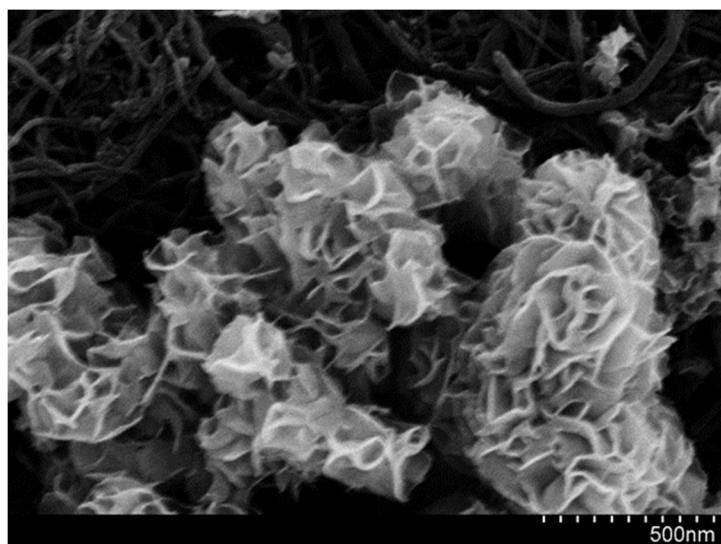

**Figure S2.** FESEM image of CNT-MoS<sub>2</sub> membrane.

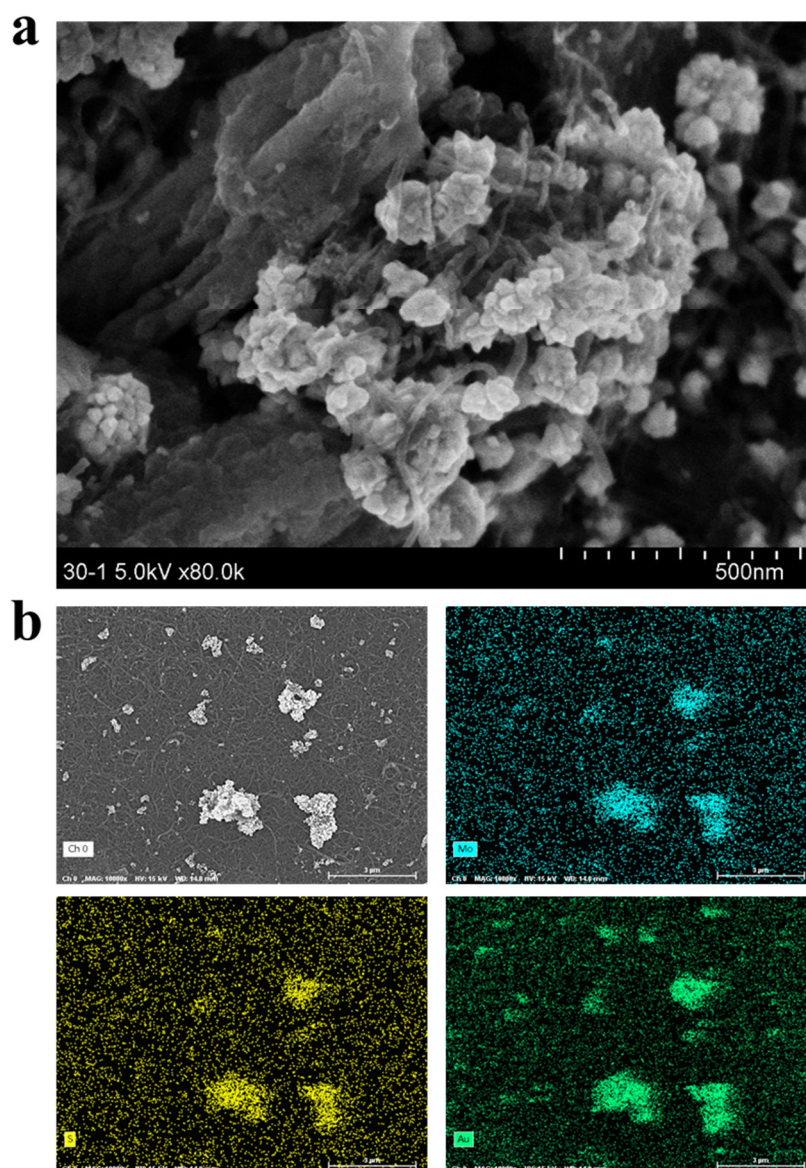

| Elements                 | C     | O    | Mo   | S    | Au   |
|--------------------------|-------|------|------|------|------|
| Atomic concentration (%) | 98.06 | 1.30 | 0.09 | 0.06 | 0.49 |

**Figure S3.** (a) FESEM and (b) FESEM-EDS mapping images of CNT-MoS<sub>2</sub>@Au-30 membrane (Au loading time, 30 min).

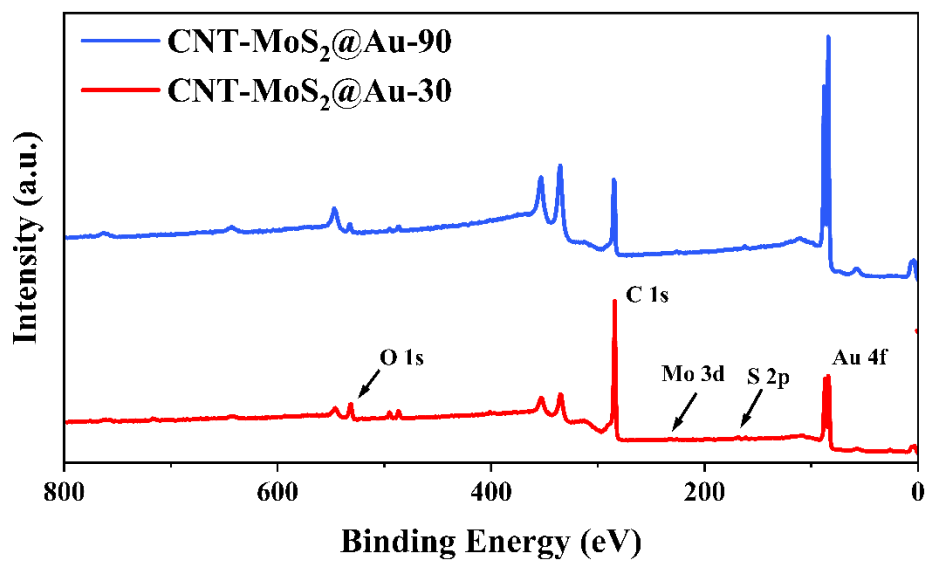

**Figure S4.** Comparison of the XPS survey spectrums of CNT-MoS<sub>2</sub>@Au catalytic membrane with different Au loading time (30 and 90 min).

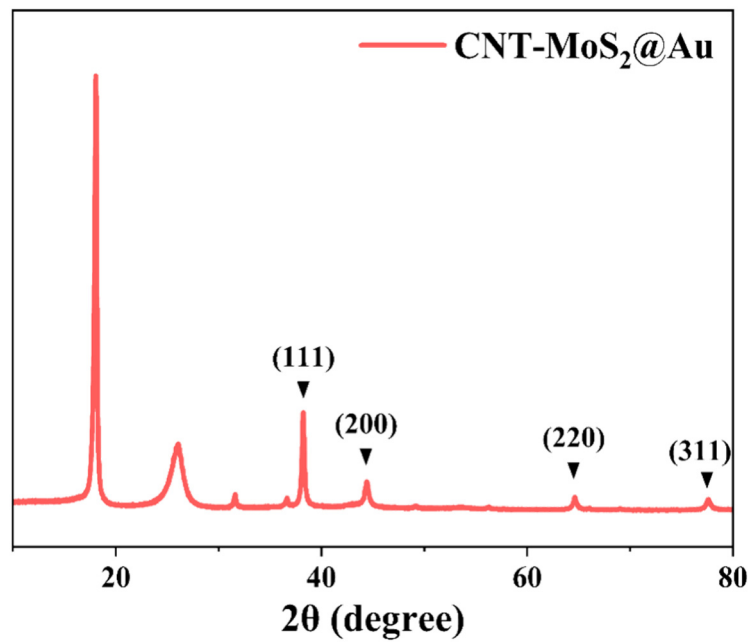

**Figure S5.** The XRD pattern of the CNT-MoS<sub>2</sub>@Au catalytic membrane.



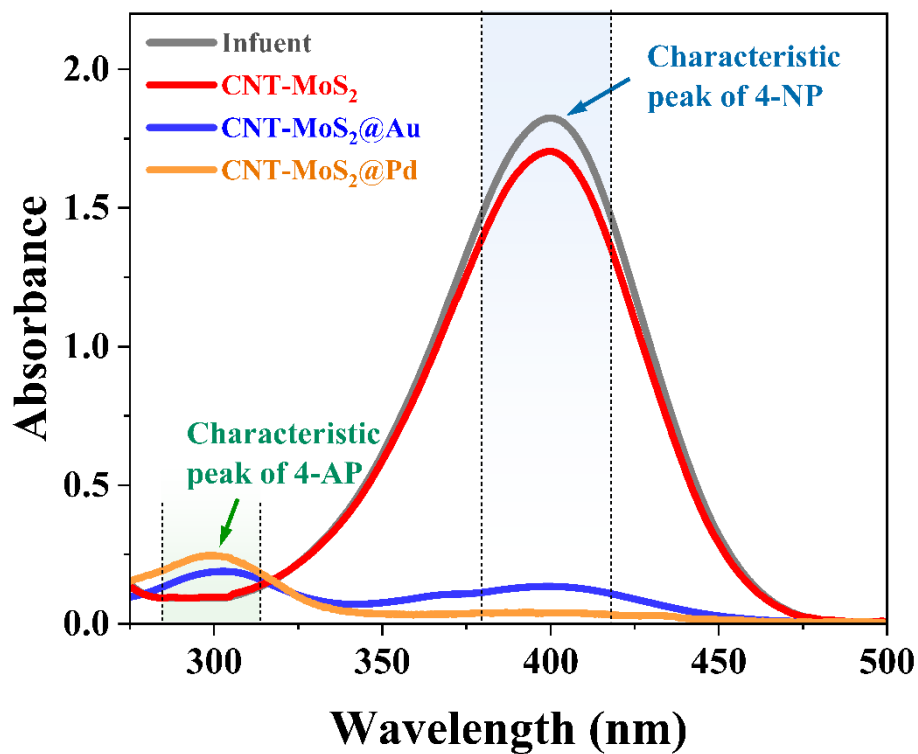

**Figure S6.** Degradation efficiency of 4-NP by using CNT-MoS<sub>2</sub> membrane, CNT-MoS<sub>2</sub>@Au membrane and CNT-MoS<sub>2</sub>@Pd membrane. Experimental conditions: [4-NP]<sub>0</sub> = 0.1 mM, flow rate = 2.0 mL/min and pH<sub>0</sub> = 8.0.

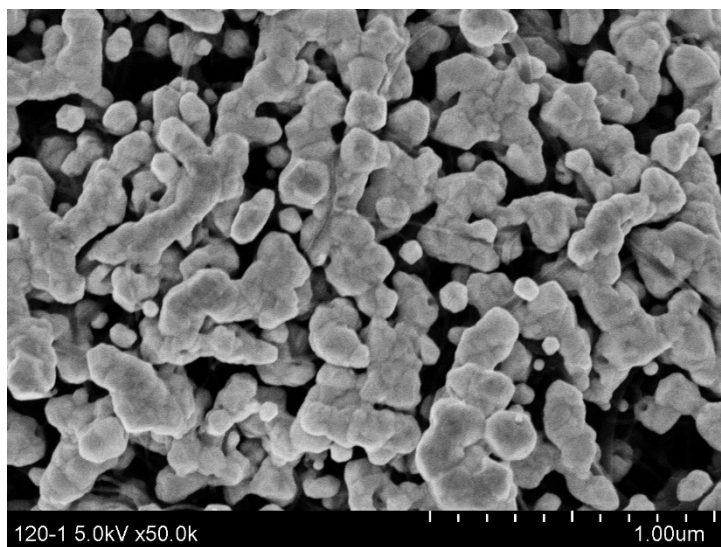

**Figure S7.** FESEM image of CNT-MoS<sub>2</sub>@Au-120 membrane (Au loading time, 120 min).

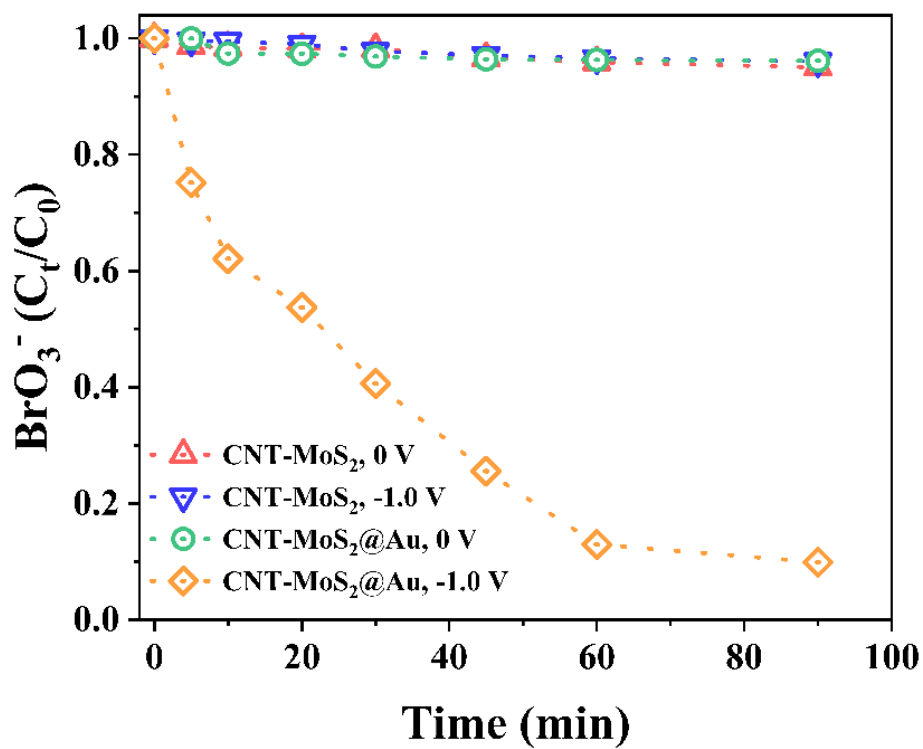

**Figure S8.** Degradation efficiency of bromate by using CNT-MoS<sub>2</sub> membrane and CNT-MoS<sub>2</sub>@Au membrane before and after applying potential. Experimental conditions: [BrO<sub>3</sub><sup>-</sup>]<sub>0</sub> = 0.1 mM, flow rate = 2.0 mL/min and pH<sub>0</sub> = 4.0.

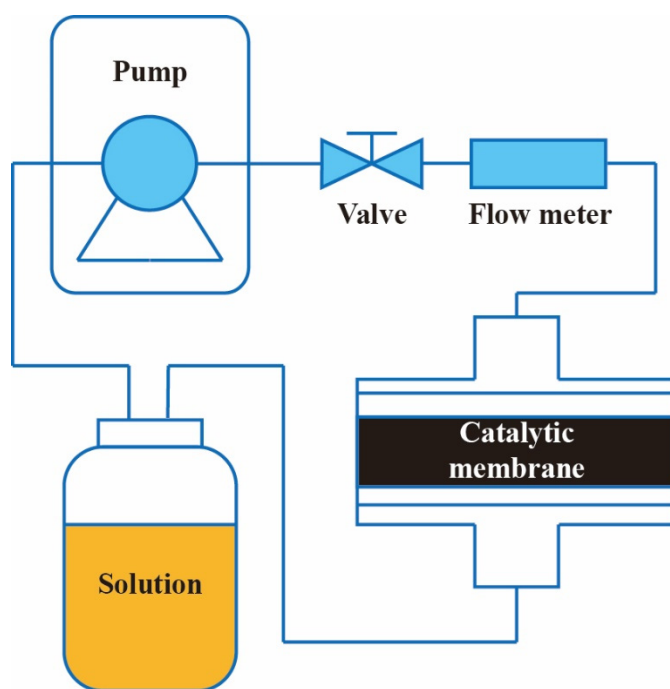

**Figure S9.** Schematic illustration of the flow-through electrocatalytic filtration system.

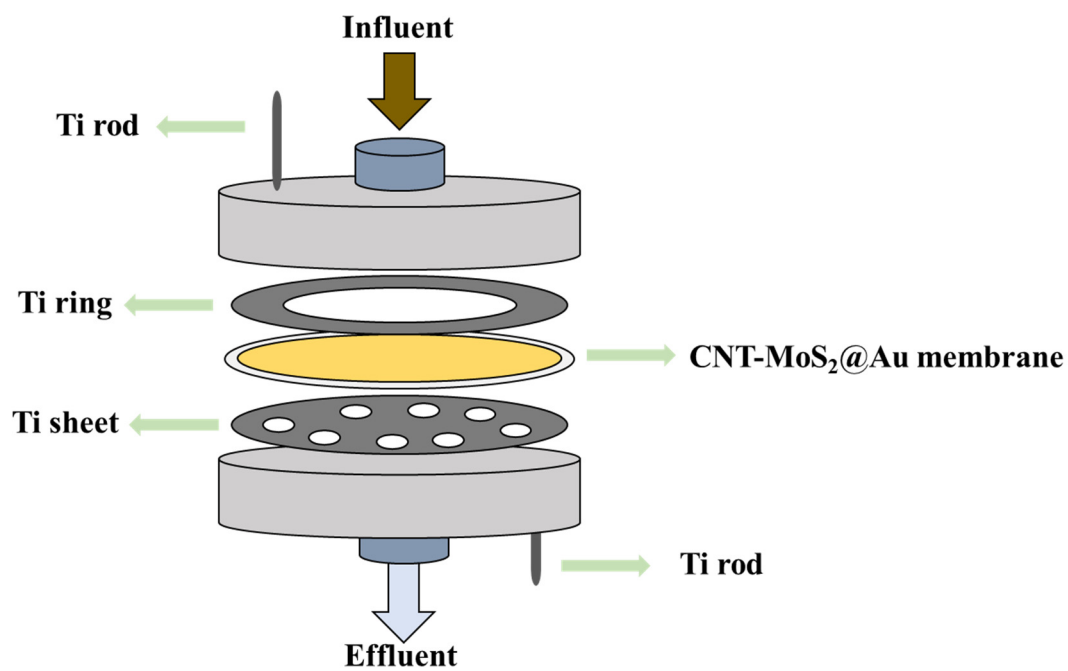

**Figure S10.** Schematic diagram of electrochemistry-modified Whatman polycarbonate filtration casing.
