# Supplementary material for: Facile Synthesis and Environmental Applications of Noble Metal-Based Catalytic Membrane Reactors
Source: MDPI journal article supplement (doi:10.3390/catal12080861), 2022-08-05
Supplement: s1 [file s1]

Archive with 1 entries (1 files):
- catalysts-1830131-supplementary.pdf
